# Supplementary material
Source: PubMed Central journal article supplement (PMC2679494)
Supplement: M900749200_1.pdf [file M900749200_1.pdf]

## Supplemental Figures

**Figure S1. Specific knockdown of ArfGAP1, ArfGAP2 and ArfGAP3 by RNAi.** HeLa cells were treated for 120 h with siRNAs indicated, and subjected to immunoblot (A) or immunofluorescence (B) analysis.

**Figure S2. Depletion of ArfGAP1 shows no discernible phenotypic change.** HeLa cells were treated for 120 h with siRNAs for LacZ (A, control) or ArfGAP1 (B), and doubly stained for ArfGAP1 (a-c) and either  $\beta$ -COP (a'), ERGIC-53 (b') or GM130 (c').

**Figure S3. Association of ArfGAP1, ArfGAP2 and ArfGAP3 with the *cis*-Golgi.** HeLa cells were left untreated (A-F) or treated with 5  $\mu$ g/ml nocodazole for 2 h (G-L), and doubly stained for ArfGAP1 (A, D, G and J), ArfGAP2 (B, E, H and K) or ArfGAP3 (C, F, I and L), and GM130 (A-C and G-I) or golgin-245 (D-F and J-L).

**Figure S4. Triple ArfGAP- or  $\beta$ -COP does not affect transferrin endocytosis.** HeLa cells treated with siRNAs for LacZ (top panels), ArfGAP1+ArfGAP2+ArfGAP3 (middle panels) or  $\beta$ -COP (bottom panels) were incubated with AlexaFluor488-conjugated transferrin for indicated time periods as described under Experimental Procedures and stained for ERGIC-53 to identify cells with stage 1 and stage 2 phenotypes (marked by '1' and '2', respectively).

**Figure S5. Two distinct phenotypic stages in cells depleted of COPI.** (A) HeLa cells treated with siRNAs for  $\beta$ -COP for 24 h were stained for ERGIC-53. A cell with normal distribution of ERGIC-53, or that with typical stage 1 or stage 2 distribution is shown. (B) HeLa cells treated with siRNAs for  $\beta$ -COP for 12 or 24 h were classified as having those with normal, stage 1 and stage 2 distributions of ERGIC-53, and the number of cells with each distribution was counted.

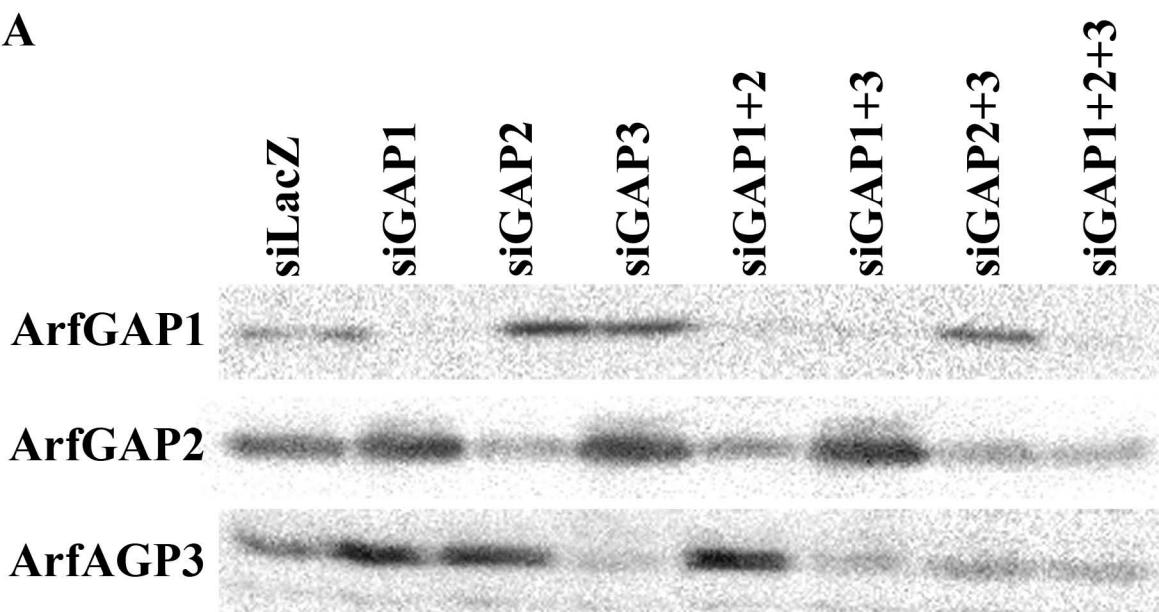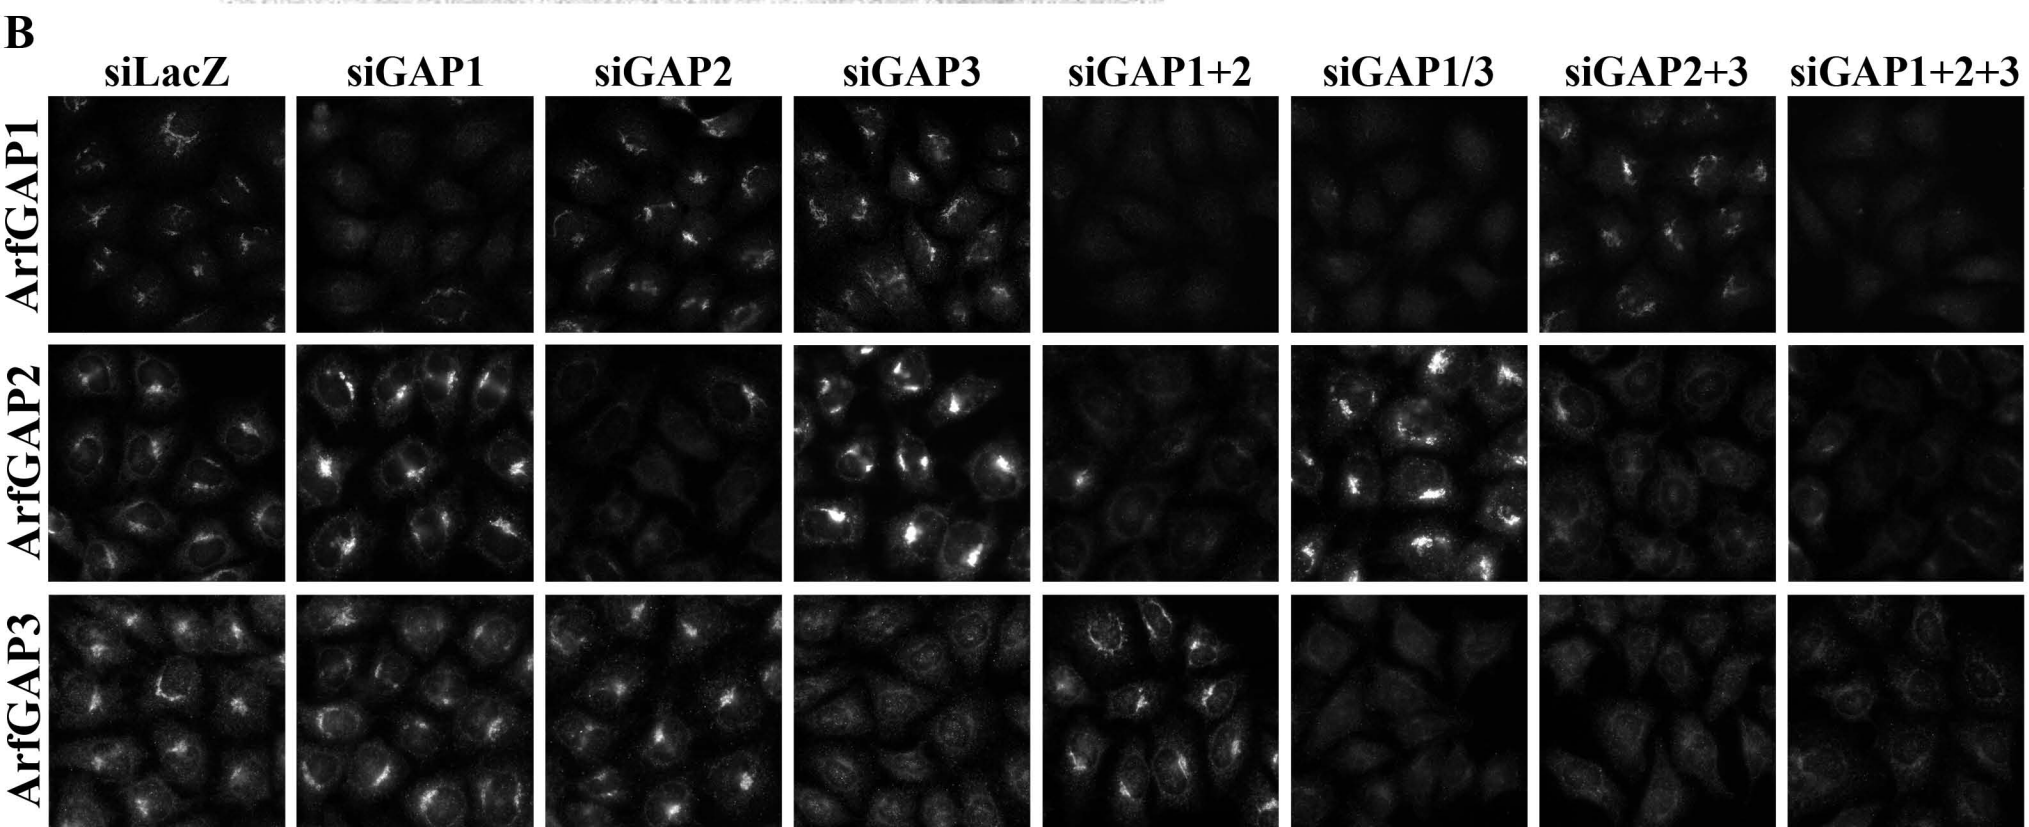

**Figure S1 (Saitoh et al.)**

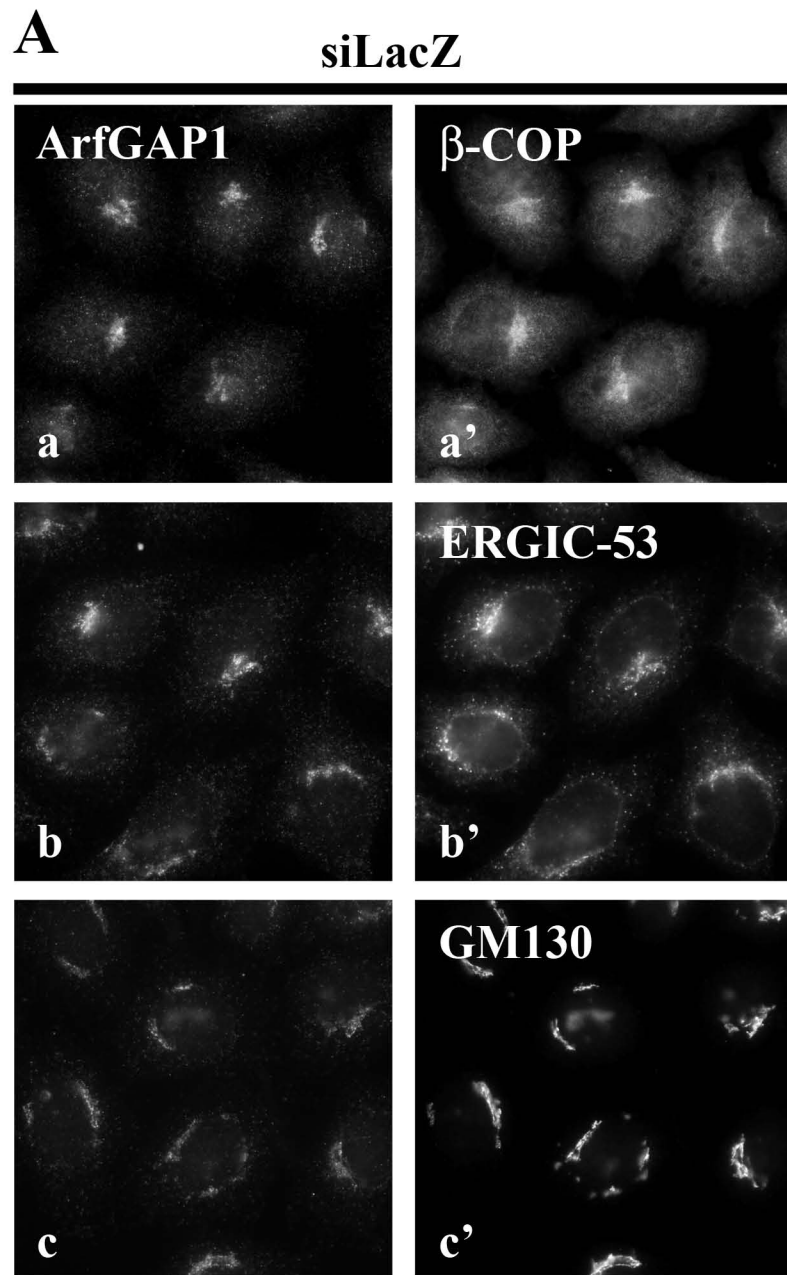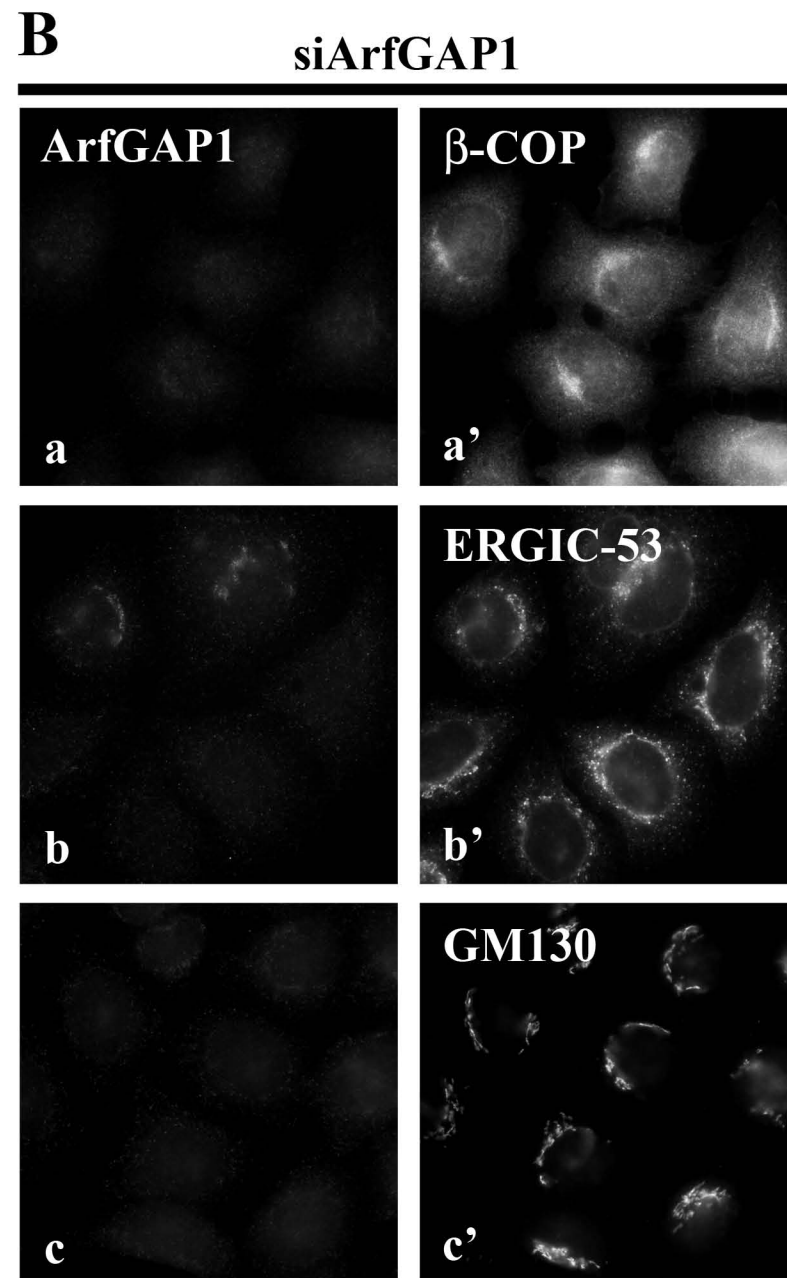

**Figure S2 (Saitoh et al.)**

Nocodazole (-)

Nocodazole (+)

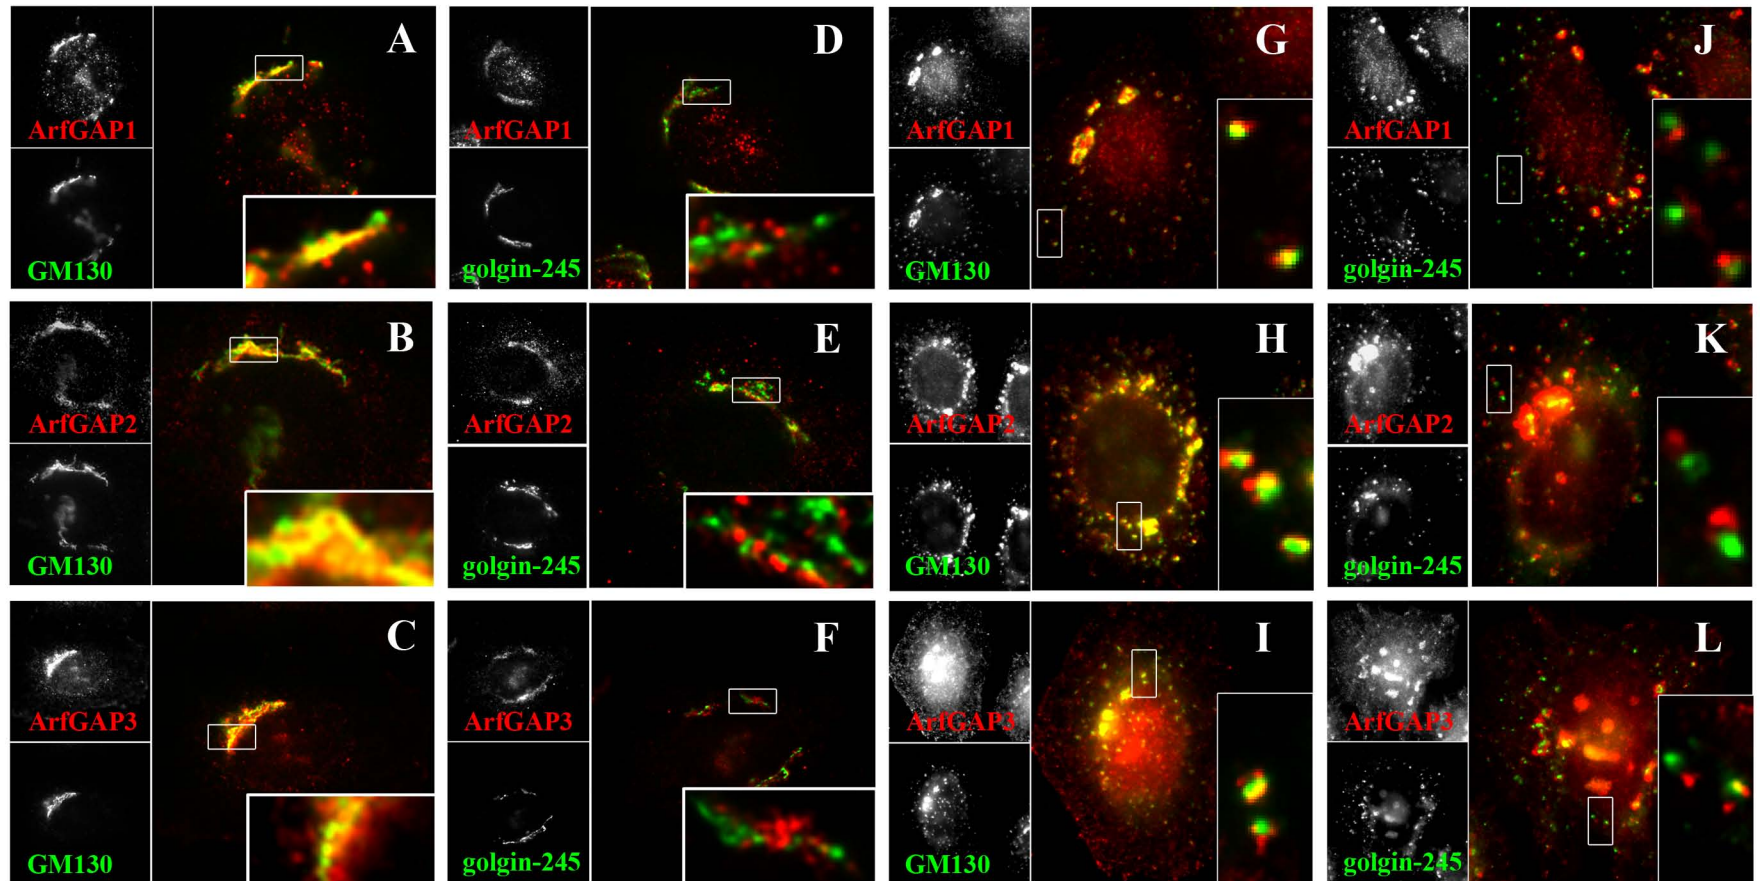

Figure S3 (Saitoh et al.)

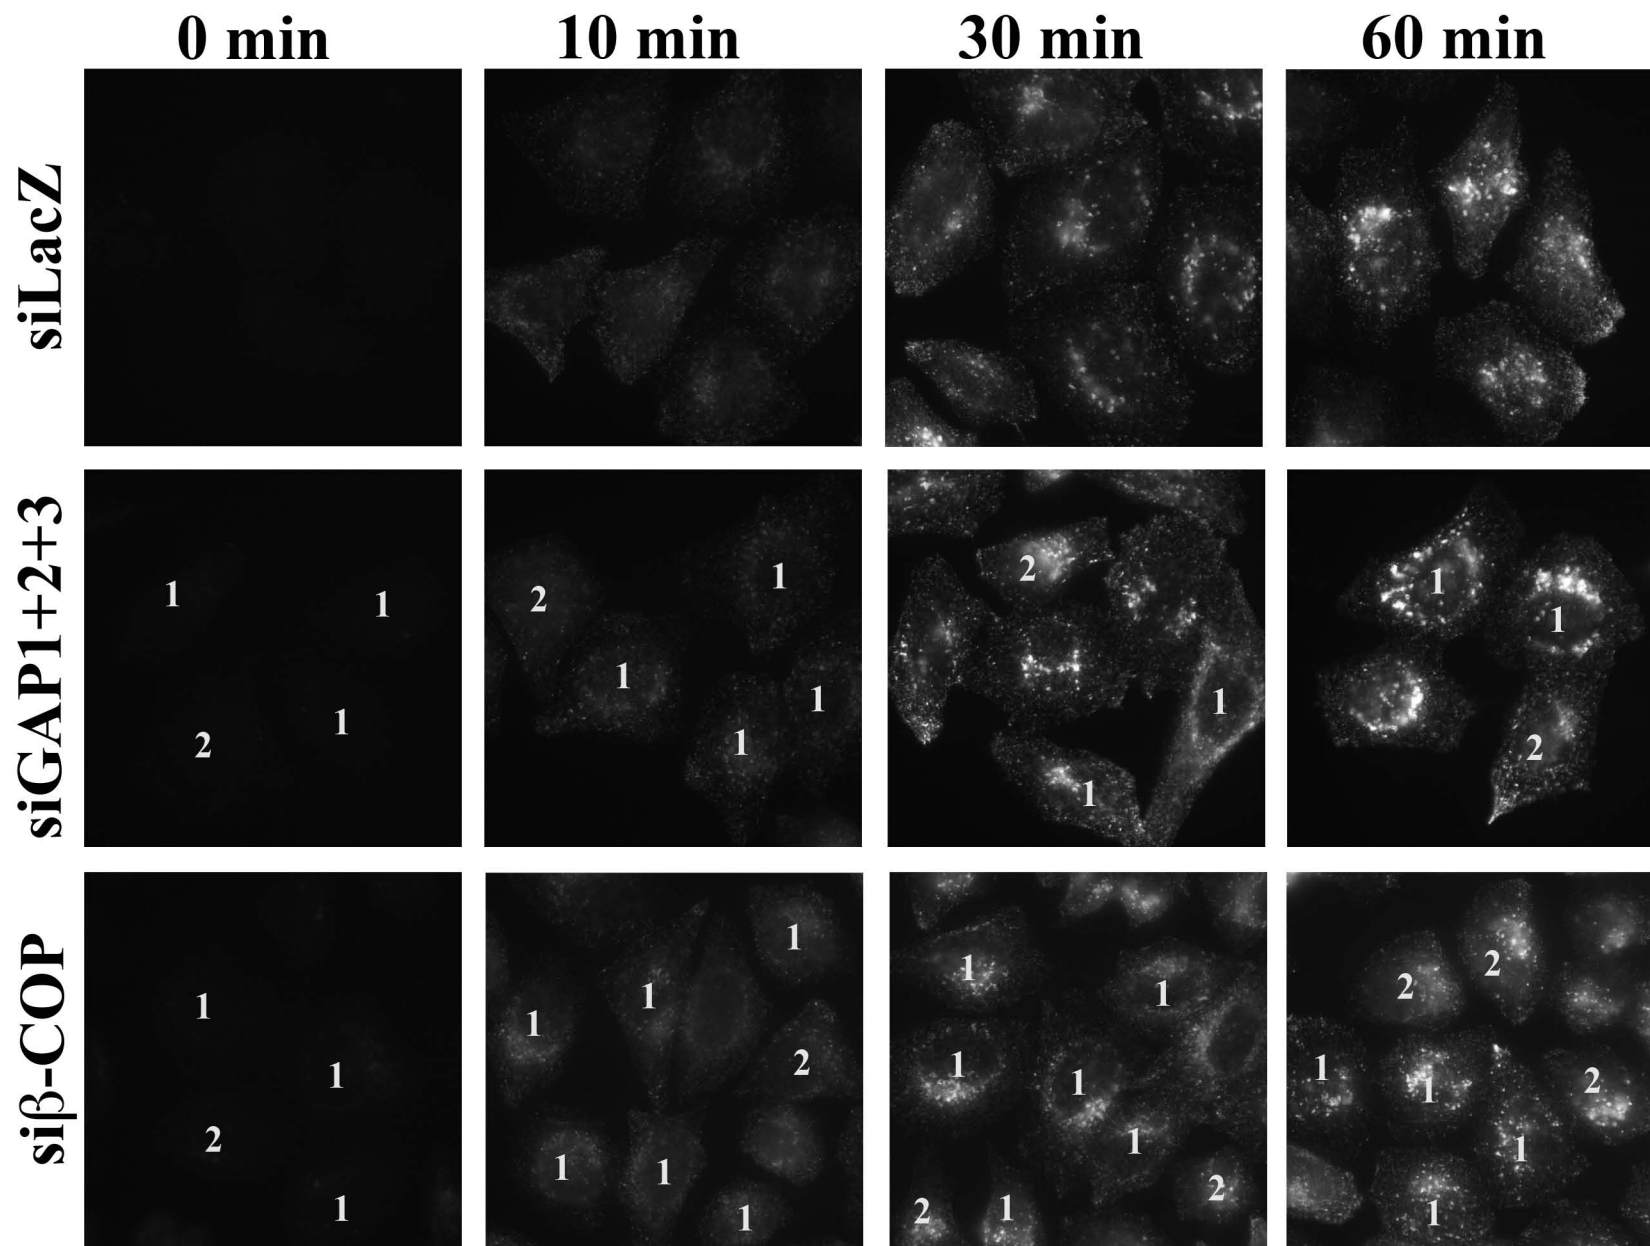

**Figure S4 (Saitoh et al.)**

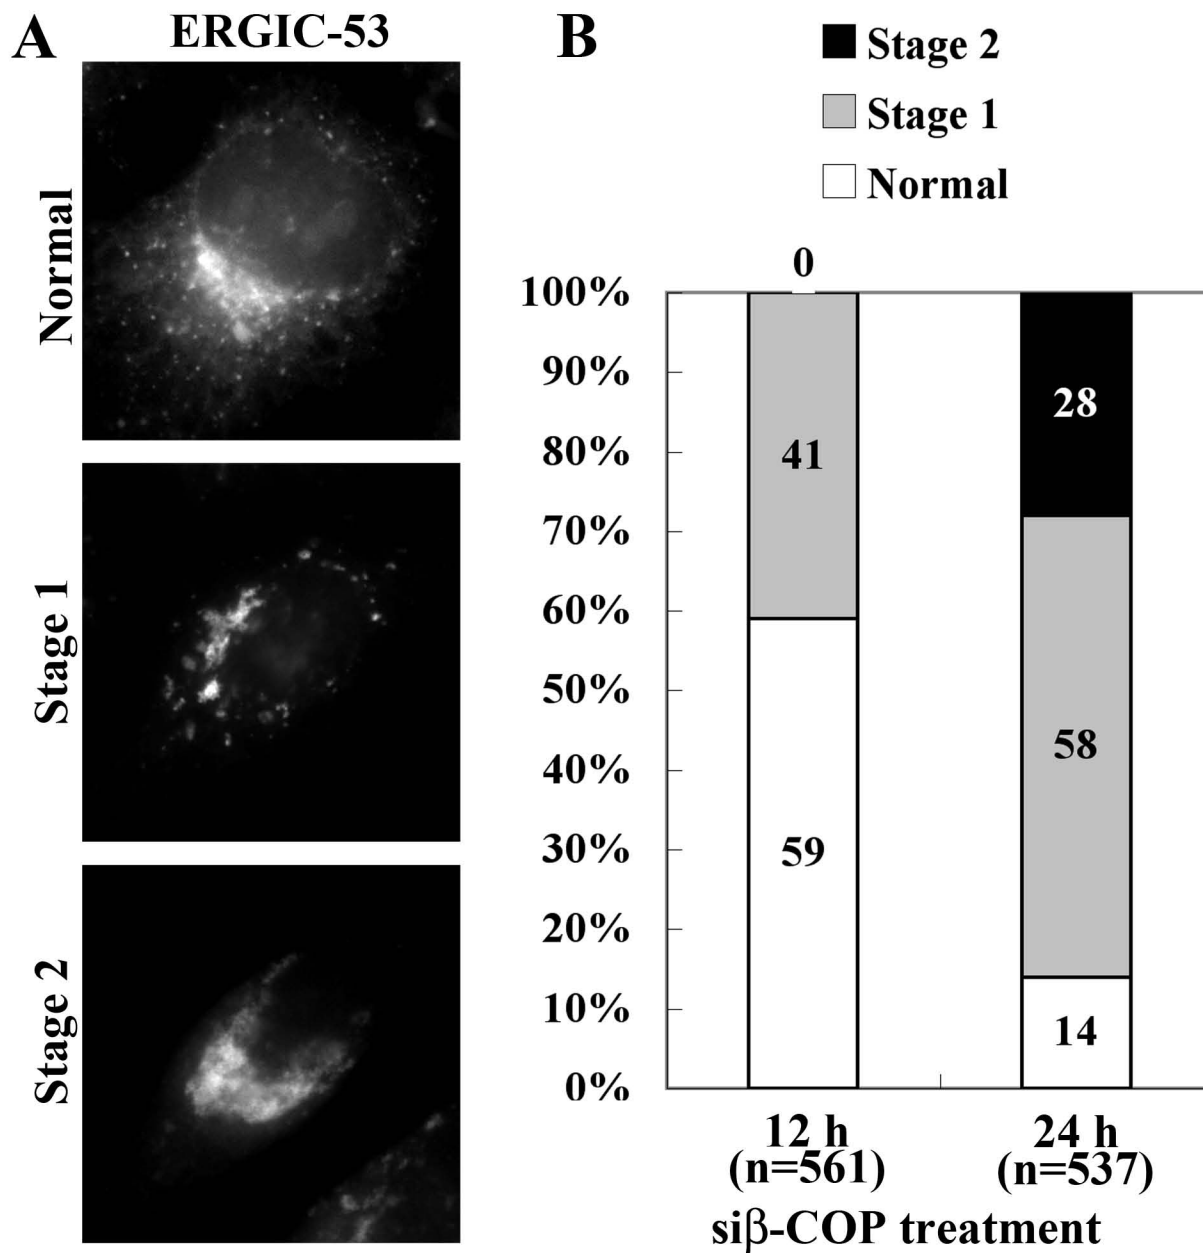

Figure S5 (Saitoh et al.)
